# Supplementary material for: Multi-isotopic analysis reveals the early stem turtle Odontochelys as a nearshore herbivorous forager
Source: Frontiers journal article supplement (doi:10.3389/fevo.2023.1175128), 2023-08-17
Supplement: Table_1.xlsx [file Table_1.xlsx]

## Sheet: Table 1 
Supplementary Table S1: Geochemical data for fossil and modern specimens (from the literature).
Sample name	Taxon	Collection number	Localiy	Age		Ecology	Reference	Type		δ13Cc (‰/VPDB)	1σ	δ18Oc (‰/VPDB)	1σ	δ18Oc (‰/VSMOW)		CO3 Wt%	1σ	δ18Oc - δ18Op		δ18Op (‰/VSMOW)	1σ		δ34Sapatite (‰/VCDT)	1σ	% S	1σ	Reference for isotopic results
OD-2	Odontochelys semitestacea	IVPP V 15653	Guanling, Guizhou Province, southwestern China	Lower Carnian	lower member of the Xiaowa Formation		Li et al. (2008)	Bone, proximal part of anterior dorsal rib		0.88	0.09	-6.53	0.14	24.18		10.7	1.6	24.2		5.2	0.1		15.3	0.9	0.23	0.02	This study
OD-3	Odontochelys semitestacea	IVPP V 15653	Guanling, Guizhou Province, southwestern China	Lower Carnian	lower member of the Xiaowa Formation		Li et al. (2008)	Bone, posterior dorsal rib		2.47	0.08	-5.06	0.14	25.70		27.0	3.6	25.7		6.3	0.4		13.7	0.1	0.31	0.09	This study
OD-4	Odontochelys semitestacea	IVPP V 13240	Guanling, Guizhou Province, southwestern China	Lower Carnian	lower member of the Xiaowa Formation		Li et al. (2008)	Bone, xiphiplastron		0.12	0.12	-6.98	0.02	23.73		19.3	3.8	23.7		3.9	0.4		-3.2	0.8	1.26	0.24	This study
ICHTH-1	Guizhouichthyosaurus tangae	IVPP V 11865	Guanling, Guizhou Province, southwestern China	Lower Carnian	lower member of the Xiaowa Formation	Aquatic marine	Li and You (2002); Shang and Li (2009); Ji et al. (2015)	Bone, skull		-5.10	0.11	-5.47	0.31	25.28		2.5	0.3	25.3		6.2	0.2		17.8	0.1	0.48	0.02	This study
ICHTH-2	Guizhouichthyosaurus tangae	IVPP V 11865	Guanling, Guizhou Province, southwestern China	Lower Carnian	lower member of the Xiaowa Formation	Aquatic marine	Li and You (2002); Shang and Li (2009); Ji et al. (2015)	Tooth bulk		-3.48	0.10	-5.64	0.12	25.11		2.6	0.3	25.1		5.9	0.2		9.9	0.1	0.68	0.14	This study
ICHTH-3	Guizhouichthyosaurus tangae	IVPP V 11865	Guanling, Guizhou Province, southwestern China	Lower Carnian	lower member of the Xiaowa Formation	Aquatic marine	Li and You (2002); Shang and Li (2009); Ji et al. (2015)	Tooth bulk		-5.23	0.49	-5.98	0.41	24.76		2.2	0.04	24.8		5.4	0.5		15.5	0.6	0.56	0.06	This study
ICHTH-4	Guizhouichthyosaurus tangae	IVPP V 11869	Guanling, Guizhou Province, southwestern China	Lower Carnian	lower member of the Xiaowa Formation	Aquatic marine	Li and You (2002); Shang and Li (2009); Ji et al. (2015)	Tooth bulk		-6.07	0.09	-5.96	0.13	24.77		2.5	0.3	24.8		5	0.2		18.1	0.4	0.53	0.07	This study
ICHTH-5	Guizhouichthyosaurus tangae	IVPP V 11869	Guanling, Guizhou Province, southwestern China	Lower Carnian	lower member of the Xiaowa Formation	Aquatic marine	Li and You (2002); Shang and Li (2009); Ji et al. (2015)	Bone jaw		-7.42	0.03	-8.44	0.11	22.22		9.6	0.3	22.2		3.1	0.4		19.2	0.7	0.46	0.08	This study
Tort-Ren-B	Jurassichelon oleronensis		Chassiron, St-Denis d'Oléron (17)	Upper Kimmeridgian		Aquatic marine	Specimen deposited in the Museum Dinoléron	Bone, skull		-3.27	0.06	-2.22	0.09	28.63		5.1	0.2	28.6		7.7	0.2		25.1	0.8	0.81	0.16	This study
Tort-G	Chelonioidea indet.	-	Talmont (17)	Middle Campanian	Biozone CV (Platel)	Aquatic marine	-	Bone, osteocute		-0.68	0.05	-2.20	0.12	28.65		6.2	0.5	28.6		8.5	0.2		-1.3	0.2	2.33	0.02	This study
-	Testudo kleinmanni	50.001313	Alexandria, Egypt	Modern	-	Terrestrial, desertic	-	Bone, plastron		-	-	-	-	-		-	-	-		24.2	0.5		17.0	0.5	0.33	0.004	Goedert et al. (2020)
-	Dogania subplana	50.001366	Tây-Ninh, Vietnam	Modern	-	Aquatic, freshwater	-	Bone, vertebra		-	-	-	-	-		-	-	-		15.1	0.4		16.3	0.2	0.38	0.05	Goedert et al. (2020)
-	Chelydra serpentina	50.001353	North America	Modern	-	Aquatic, freshwater	-	Bone, skull fragment		-	-	-	-	-		-	-	-		16.4	0.2		11.3	0.5	0.64	0.01	Goedert et al. (2020)
-	Chelonia mydas	50.001331	Gulf of Siam, Asia	Modern	-	Aquatic, seawater	-	Bone, nasal fragment		-	-	-	-	-		-	-	-		20.7	0.2		22.9	0.4	0.43	0.02	Goedert et al. (2020)
-	Chelonia mydas	50.001334	Mediteranean Sea, Syria	Modern	-	Aquatic, seawater	-	Bone, skull fragment		-	-	-	-	-		-	-	-		22.8	0.3		19.5	0.2	0.56	0.01	Goedert et al. (2020)
-	Amblyrhynchus cristatus	50.001410	Galápagos Islands	Modern	-	Semi-aquatic, seawater	-	Bone, rib		-	-	-	-	-		-	-	-		20.4	0.6		10.0	0.1	0.43	0.01	Goedert et al. (2020)
-	Dugong dugon	50.002521	Red Sea, Yemen	Modern	-	Aquatic, seawater		Bone, rib fragment		-	-	-	-	-		-	-	-		20.0	0.3		10.3	0.1	0.5	0.02	Goedert et al. (2020)
Tr-sc-1	Trachemys scripta elegans	-	Lyon, France	Modern	-	Aquatic, freshwater	-	Bone		-	-	-	-	-		-	-	-		17.2	0.2		9.1	0.3	0.31	0.04	Goedert et al. (2018)
Tr-sc-3	Trachemys scripta elegans	-	Lyon, France	Modern	-	Aquatic, freshwater	-	Bone		-	-	-	-	-		-	-	-		19.7	0.2		9.3	0.4	0.37	0.03	Goedert et al. (2018)
Tr-sc-4	Trachemys scripta elegans	-	Lyon, France	Modern	-	Aquatic, freshwater	-	Bone		-	-	-	-	-		-	-	-		14.2	0.1		8.8	0.3	0.47	0.03	Goedert et al. (2018)
Tr-sc-5	Trachemys scripta elegans	-	Lyon, France	Modern	-	Aquatic, freshwater	-	Bone		-	-	-	-	-		-	-	-		15.3	0.2		6.7	0.4	0.49	0.01	Goedert et al. (2018)
-	Taxon			Modern	-	Aquatic, marine				δ13Cc (‰/VPDB)	1σ	δ18Oc (‰/VPDB)	1σ														Reference
-	Chelonia mydas	green turtle		Modern	-	Aquatic, marine				0.8	0.2	-	-			-	-	-		-	-		-	-	-	-	Biasatti et al. (2004)
-	Chelonia mydas	green turtle		Modern	-	Aquatic, marine				0.4	0.1	-	-			-	-	-		-	-		-	-	-	-	Biasatti et al. (2004)
-	Chelonia mydas	green turtle		Modern	-	Aquatic, marine				-0.4	0.1	-	-			-	-	-		-	-		-	-	-	-	Biasatti et al. (2004)
-	Chelonia mydas	green turtle		Modern	-	Aquatic, marine				-0.5	0.2	-	-			-	-	-		-	-		-	-	-	-	Biasatti et al. (2004)
-	Chelonia mydas	green turtle		Modern	-	Aquatic, marine				0.6	0.4	-	-			-	-	-		-	-		-	-	-	-	Biasatti et al. (2004)
-	Chelonia mydas	green turtle		Modern	-	Aquatic, marine				1.5	0.3	-	-			-	-	-		-	-		-	-	-	-	Biasatti et al. (2004)
-	Chelonia mydas	green turtle		Modern	-	Aquatic, marine				0.6	0.1	-	-			-	-	-		-	-		-	-	-	-	Biasatti et al. (2004)
										Mean (n =7)	1σ
										0.4	0.7
-	Dermochelys coriacea	leatherback turtle		Modern	-	Aquatic, marine				-6.2	0.3	-	-			-	-	-		-	-		-	-	-	-	Biasatti et al. (2004)
-	Dermochelys coriacea	leatherback turtle		Modern	-	Aquatic, marine				-9.4	0.3	-	-			-	-	-		-	-		-	-	-	-	Biasatti et al. (2004)
-	Dermochelys coriacea	leatherback turtle		Modern	-	Aquatic, marine				-9.7	0.2	-	-			-	-	-		-	-		-	-	-	-	Biasatti et al. (2004)
-	Dermochelys coriacea	leatherback turtle		Modern	-	Aquatic, marine				-10.6	0.1	-	-			-	-	-		-	-		-	-	-	-	Biasatti et al. (2004)
-	Dermochelys coriacea	leatherback turtle		Modern	-	Aquatic, marine				-12.3	0.2	-	-			-	-	-		-	-		-	-	-	-	Biasatti et al. (2004)
										Mean (n = 5)	1σ
										-9.6	2.2
-	Lepidochelys olivacea	olive ridley turtle		Modern	-	Aquatic, marine				-6.8	0.1	-	-			-	-	-		-	-		-	-	-	-	Biasatti et al. (2004)
-	Lepidochelys olivacea	olive ridley turtle		Modern	-	Aquatic, marine				-7.4	0.3	-	-			-	-	-		-	-		-	-	-	-	Biasatti et al. (2004)
-	Lepidochelys olivacea	olive ridley turtle		Modern	-	Aquatic, marine				-8.9	0.1	-	-			-	-	-		-	-		-	-	-	-	Biasatti et al. (2004)
-	Lepidochelys olivacea	olive ridley turtle		Modern	-	Aquatic, marine				-13.9	0.1	-	-			-	-	-		-	-		-	-	-	-	Biasatti et al. (2004)
										Mean (n = 4)	1σ
										-9.3	3.2
										Mean (n = 31)	1σ
-	Caretta caretta	Pacific loggerhead turtle		Modern	-	Aquatic, marine				-9.0	0.6	1.3	0.6			-	-	-		-	-		-	-	-	-	Wheatley et al. (2012)
										Mean (n = 5)	1σ
-	Amblyrhynchus cristatus	marine iguana		Modern	-	Semi-aquatic, marine				-4.2	2.2	-0.8	0.6			-	-	-		-	-		-	-	-	-	Wheatley et al. (2012)
										Mean (n = 6)	1σ
-	Dugong dugon	dugong		Modern	-	aquatic, marine				1.2	0.9	-	-			-	-	-		-	-		-	-	-	-	MacFadden et al. (2004)
