# Supplementary material for: Multi-isotopic analysis reveals the early stem turtle Odontochelys as a nearshore herbivorous forager
Source: Frontiers journal article supplement (doi:10.3389/fevo.2023.1175128), 2023-08-17
Supplement: Table_2.xlsx [file Table_2.xlsx]

## Sheet: Feuil1
Supplementary Table 2: Oxygen isotope compositions of environmental water calculated from d18Op values.
Sample name	Taxon	Collection number	Type		δ18Op (‰/VSMOW)	1σ		δ18Ow (‰/VSMOW)	1σ*		Reference for δ18Op - δ18Ow fractionation equation
OD-1	Odontochelys semitestacea	IVPP V 15653	Sediment		-	-		-	-
OD-2	Odontochelys semitestacea	IVPP V 15653	Bone, dorsal rib		19.0	0.1		-2.3	0.9		Pouech et al. (2014)
OD-3	Odontochelys semitestacea	IVPP V 15653	Bone, ?		19.4	0.4		-2.0	0.9		Pouech et al. (2014)
OD-4	Odontochelys semitestacea	IVPP V 13240	Bone, xiphiplastron		19.8	0.4		-1.5	0.9		Pouech et al. (2014)
ICHTH-1	Shastasaurus tangae	IVPP V 11865	Bone, skull		19.1	0.2		0.2	0.3		Ciner et al. (2016)
ICHTH-2	Shastasaurus tangae	IVPP V 11865	Tooth bulk		19.2	0.2		0.3	0.4		Ciner et al. (2016)
ICHTH-3	Shastasaurus tangae	IVPP V 11865	Tooth bulk		19.4	0.5		0.5	0.4		Ciner et al. (2016)
ICHTH-4	Shastasaurus tangae	IVPP V 11869	Tooth bulk		19.7	0.2		0.8	0.4		Ciner et al. (2016)
ICHTH-5	Shastasaurus tangae	IVPP V 11869	Bone jaw		19.1	0.4		0.2	0.3		Ciner et al. (2016)
Tort-Ren-B	Jurassichelon oleronensis		Bone, skull		20.9	0.2		-0.4	0.9		Pouech et al. (2014)
Tort-G	Chelonioidea indet.	-	Bone, osteocute		20.2	0.2		-1.2	0.9		Pouech et al. (2014)
-	Testudo kleinmanni	50.001313	Bone, plastron		24.2	0.5		2.8	0.9		Pouech et al. (2014)**
-	Dogania subplana	50.001366	Bone, vertebra		15.1	0.4		-6.2	0.9		Pouech et al. (2014)**
-	Chelydra serpentina	50.001353	Bone, skull fragment		16.4	0.2		-4.9	0.9		Pouech et al. (2014)**
-	Chelonia mydas	50.001331	Bone, nasal fragment		20.7	0.2		-0.6	0.9		Pouech et al. (2014)**
-	Chelonia mydas	50.001334	Bone, skull fragment		22.8	0.3		1.5	0.9		Pouech et al. (2014)**
-	Amblyrhynchus cristatus	50.001410	Bone, rib		20.4	0.6		-2.4	2.2		Amiot et al. (2007)**
-	Dugong dugon	50.002521	Bone, rib fragment		20.0	0.3		1.1	0.7		Cinner et al. (2016)**
Tr-sc-1	Trachemys scripta elegans	-	Bone		17.2	0.2		-4.1	0.9		Pouech et al. (2014)**
Tr-sc-3	Trachemys scripta elegans	-	Bone		19.7	0.2		-1.6	0.9		Pouech et al. (2014)**
Tr-sc-4	Trachemys scripta elegans	-	Bone		14.2	0.1		-7.1	0.9		Pouech et al. (2014)**
Tr-sc-5	Trachemys scripta elegans	-	Bone		15.3	0.2		-6.0	0.9		Pouech et al. (2014)**
	*Standard deviations have been calculated following Pryor et al. (2014). Quantification and propagation of errors when converting vertebrate biomineral oxygen isotope data to temperature for palaeoclimate reconstruction. Palaeogeography, Palaeoclimatology, Palaeoecology
	**These fractionation equations were applied in Goedert et al. (2020).
